# Supplementary material for: Preparation of cationized gelatin nanospheres incorporating molecular beacon to visualize cell apoptosis
Source: PubMed Central journal article supplement (PMC6172245; doi:10.1038/s41598-018-33231-2), 2018-10-04
Supplement: 41598_2018_33231_MOESM1_ESM.pdf [file 41598_2018_33231_MOESM1_ESM.pdf]

## **Supplementary Information**

### **Preparation of cationized gelatin nanospheres incorporating molecular beacon to visualize cell apoptosis**

Yuki Murata, Jun-ichiro Jo, and Yasuhiko Tabata\*

Laboratory of Biomaterials, Institute for Frontier Life and Medical Sciences, Kyoto University, 53 Kawara-cho Shogoin, Sakyo-ku Kyoto 606-8507, Japan

\*Corresponding author. Laboratory of Biomaterials, Department of Regeneration Science and Engineering, Institute for Frontier Life and Medical Sciences, Kyoto University, 53 Kawara-cho Shogoin, Sakyo-ku, Kyoto 606-8507, Japan.

Tel.: +81 75 751 4121

Fax: +81 75 751 4646

E-mail: [yasuhiko@infront.kyoto-u.ac.jp](mailto:yasuhiko@infront.kyoto-u.ac.jp)

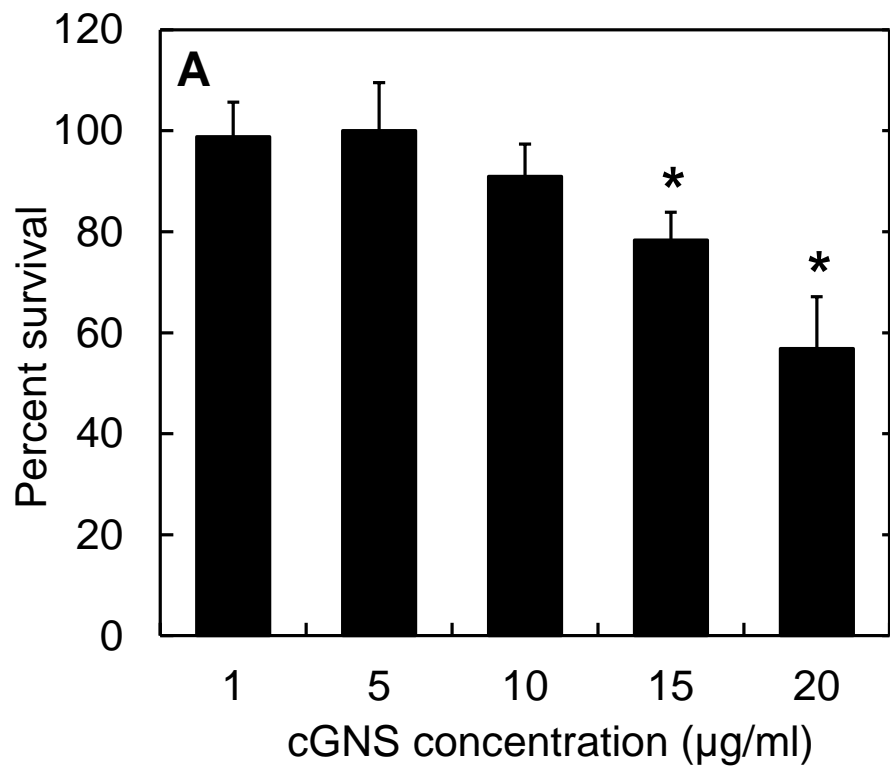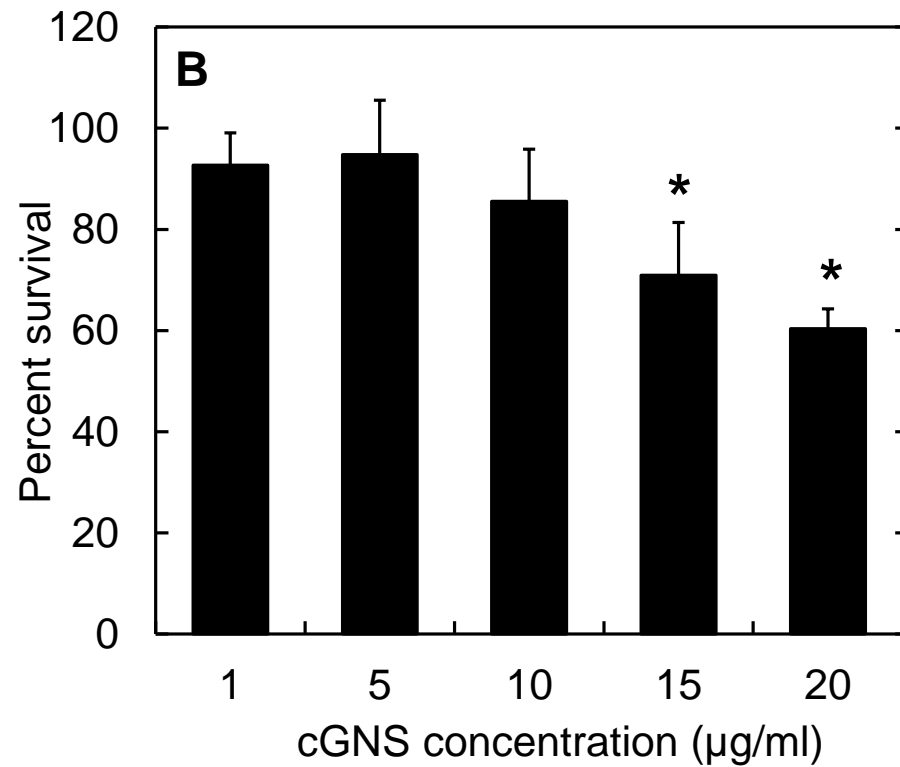

**Supplementary Figure 1**

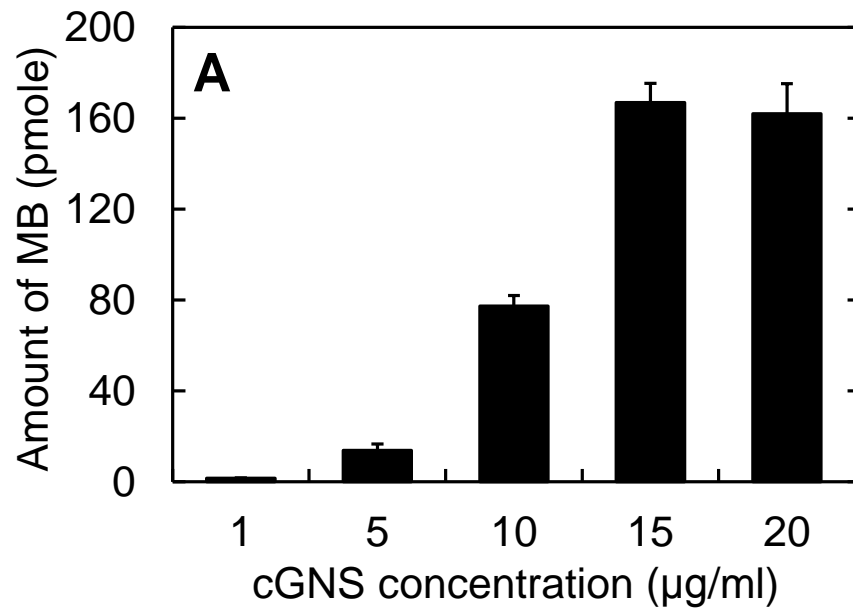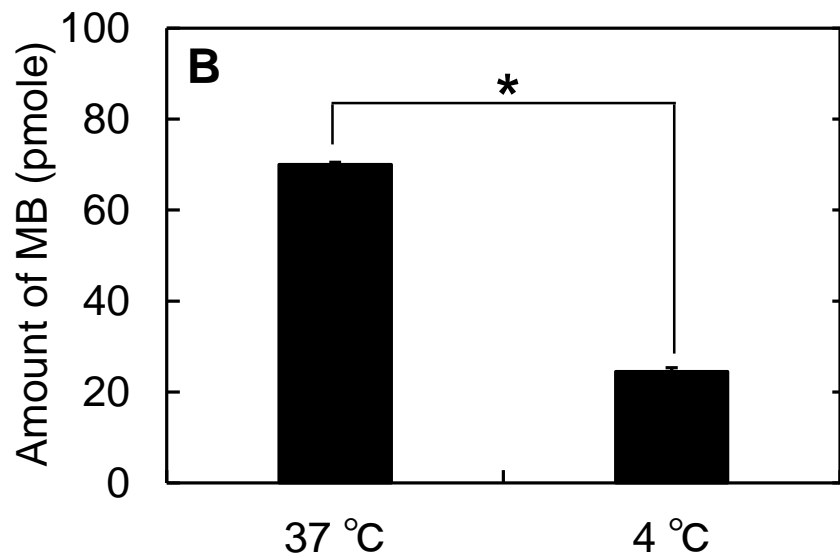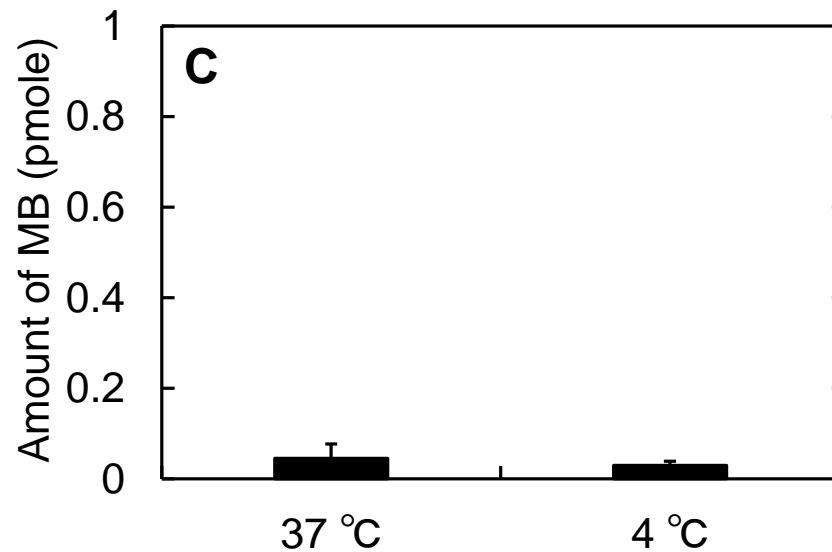

**Supplementary Figure 2**

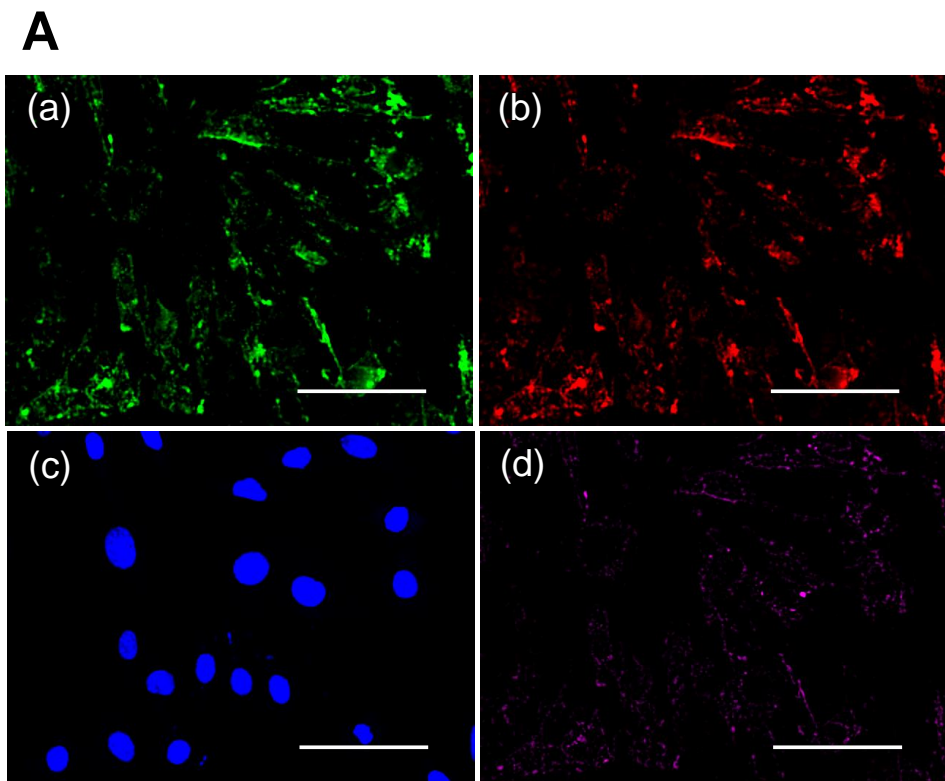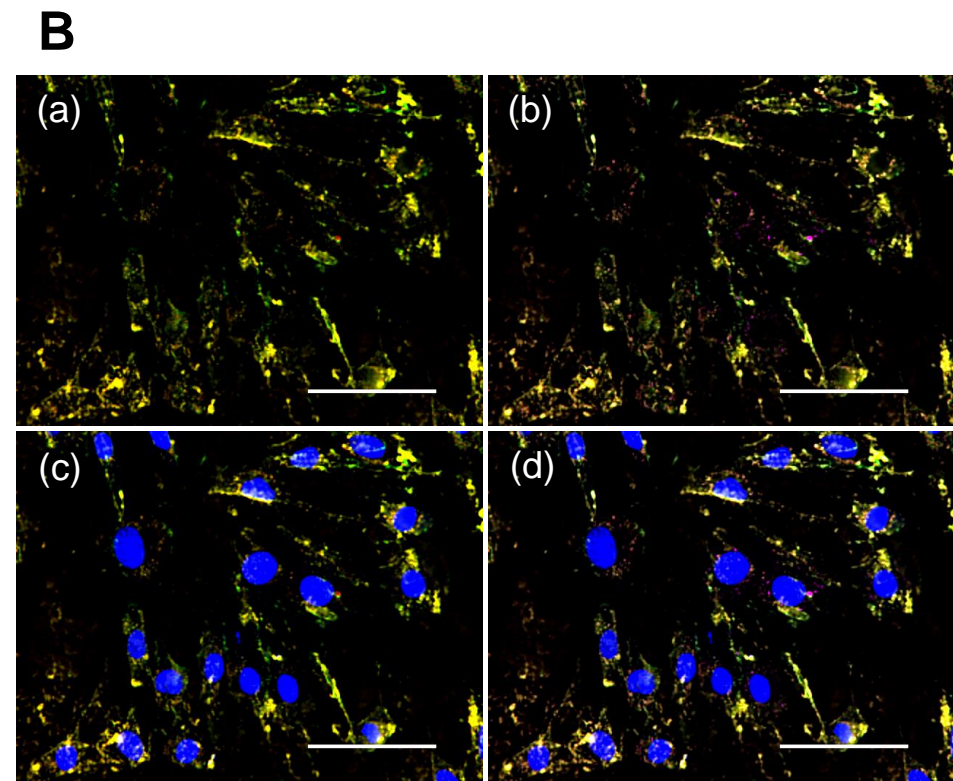

**Supplementary Figure 3**

## Supplementary Figure Legends

**Supplementary Figure 1.** Viability of cells incubated with different concentrations of cGNS<sub>GAP MB</sub> (A) and cGNS<sub>casp3 MB</sub> (B). The viability of cells without incubation with cGNS was expressed 100%. \*,p < 0.05; significant against the percent survival of cells without cGNS.

**Supplementary Figure 2.** Cellular internalization of free GAP MB and cGNS<sub>GAP MB</sub>. (A) The effect of cGNS concentrations on the amount of MB internalized into the cells. (B) The amount of MB internalized into cells after incubation with cGNS<sub>GAP MB</sub> (10 µg/ml, 153 pmole of MB) at 37 and 4 °C. (C) The amount of MB internalized into cells after incubation with free GAP MB (153 pmole) at 37 and 4 °C. \*,p < 0.05; significant against the amount at 37 °C.

**Supplementary Figure 3.** Fluorescent microscopic images of FITC-cGNS<sub>GAP MB</sub> internalized into cells. (A) Fluorescent images of cells after incubation with FITC-cGNS<sub>GAP MB</sub> (10 µg/ml): (a) Green: cGNS, (b) Red: GAP MB, (c) Blue: nuclei, and (d) Magenta: lysosomes. (B) Merged fluorescent images: (a) cGNS and GAP MB, (b) cGNS, GAP MB, and lysosomes, (c) cGNS, GAP MB, and nuclei, and (d) cGNS, GAP MB, nuclei, and lysosomes. Scale bar is 100 µm.
